# Supplementary material
Source: Springer Nature journal article supplement (https://www.springermedizin.de/resource/supplementary/12885_2011_2863_MOESM9_ESM.pdf/9461938)

DMSO : + - + -

LY294002 : - + - +

Esel : - - + +

NF $\kappa$ B p65 - 

TBP - 

Supplement: MOESM9 [file 9461938]
